# Supplementary material for: Identification of Human Junctional Adhesion Molecule 1 as a Functional Receptor for the Hom-1 Calicivirus on Human Cells
Source: PubMed Central journal article supplement (PMC5312078; doi:10.1128/mbio.00031-17), 2017-02-14

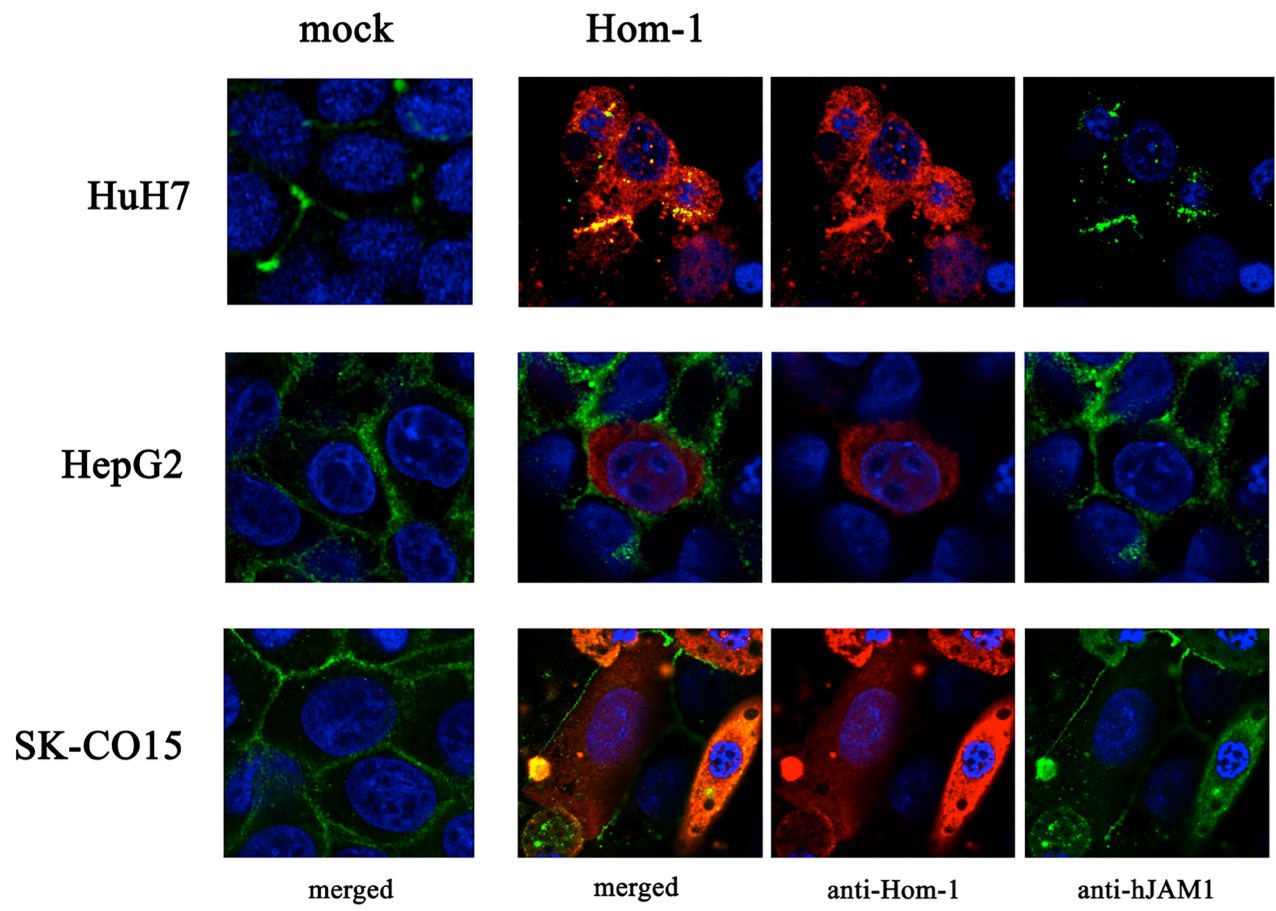

Supplement: mbo001173190sf2.pdf [file mbo001173190sf2.pdf]
