# Supplementary material for: Identification of Human Junctional Adhesion Molecule 1 as a Functional Receptor for the Hom-1 Calicivirus on Human Cells
Source: PubMed Central journal article supplement (PMC5312078; doi:10.1128/mbio.00031-17), 2017-02-14

**A.**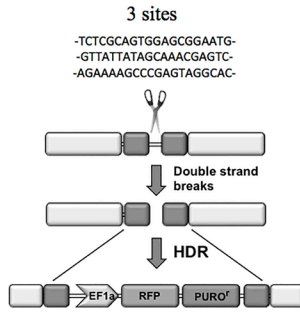**HuH7/RFP**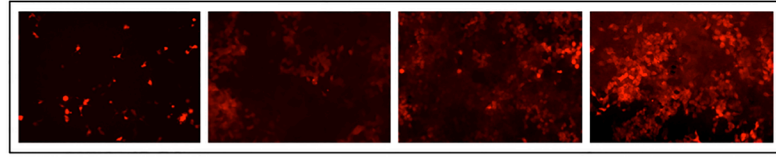

post transfection

post puromycin  
selection (CR)post FACS  
enrichment (Enr)post Hom-1  
infection (pH1)**B.****HuH7/CRISPR + Hom-1**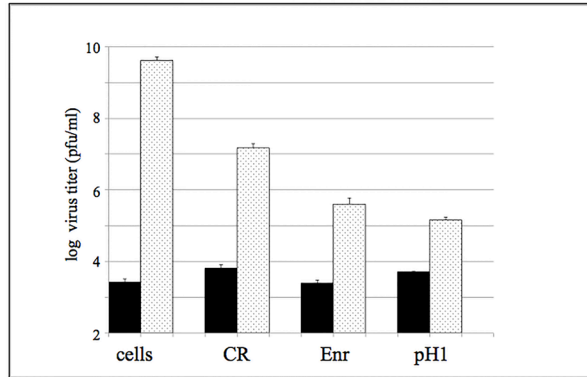**C.**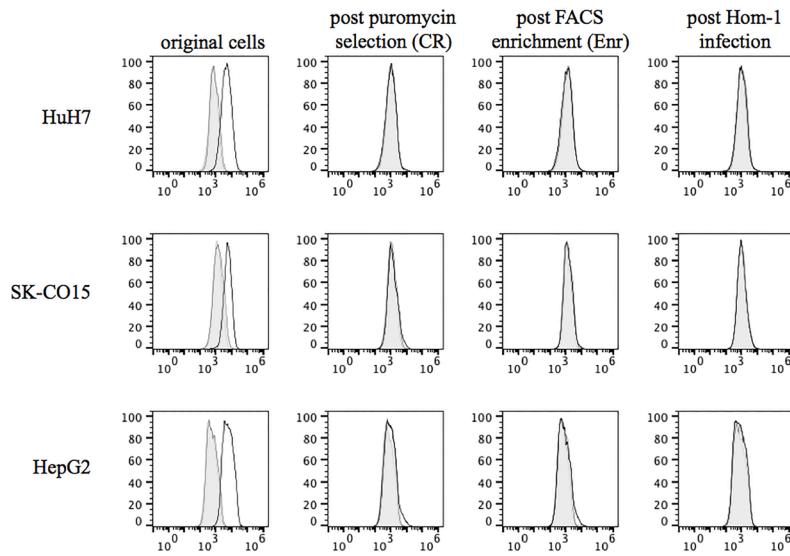**D.**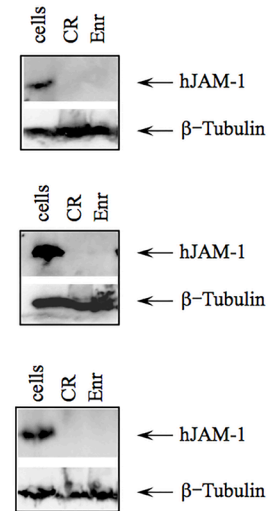

Supplement: mbo001173190sf3.pdf [file mbo001173190sf3.pdf]
